# Supplementary material for: Stomatal conductance limited the CO2 response of grassland in the last century
Source: PubMed Central journal article supplement (PMC7989024; doi:10.1186/s12915-021-00988-4), 2021-03-24
Supplement: 12915_2021_988_MOESM1_ESM.pdf [file 12915_2021_988_MOESM1_ESM.pdf]

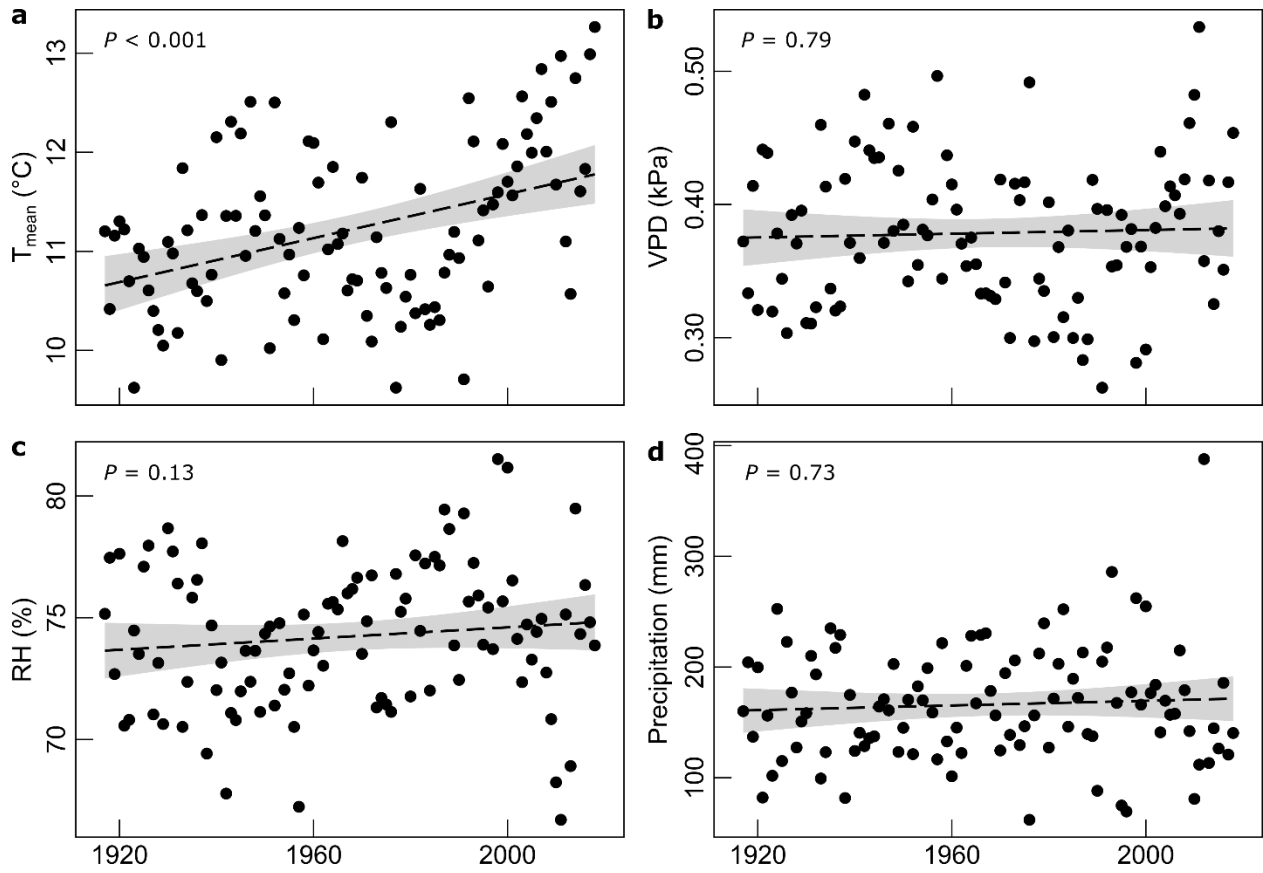

**Figure S1. Spring (April-June) meteorological data during the last 100 years.** Mean air temperature (a), vapour pressure deficit, VPD (b), relative humidity of air, RH (c) and cumulative precipitation (d). The continuous lines and the shadowed area represent the linear regression  $\pm$  CI95%. Data points correspond to yearly averages of daily values recorded at the Rothamsted Weather Station between April and June. *P*-values correspond to results of Mann-Kendall trend tests.

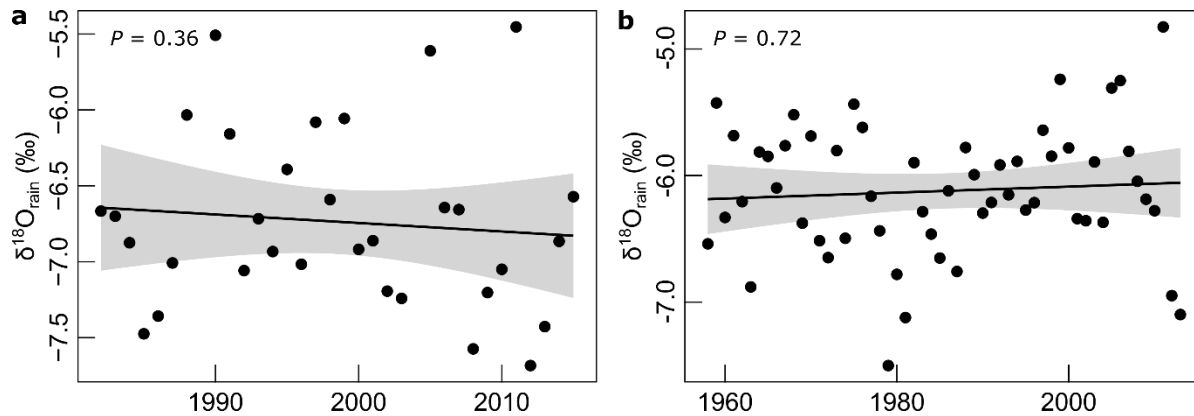

**Figure S2.  $\delta^{18}\text{O}_{\text{rain}}$  long-term trends.** Long-term trends of  $\delta^{18}\text{O}_{\text{rain}}$  measured at the Wallingford GNIP monitoring station (a) or obtained from the outputs of the ECHAM5 model (b). Data points are annual averages (Wallingford: 1982-2015; ECHAM5: 1958-2013), calculated from monthly values. The continuous lines and the shadowed areas represent the linear regression  $\pm$  CI95%. *P*-values correspond to results of Mann-Kendall trend tests.

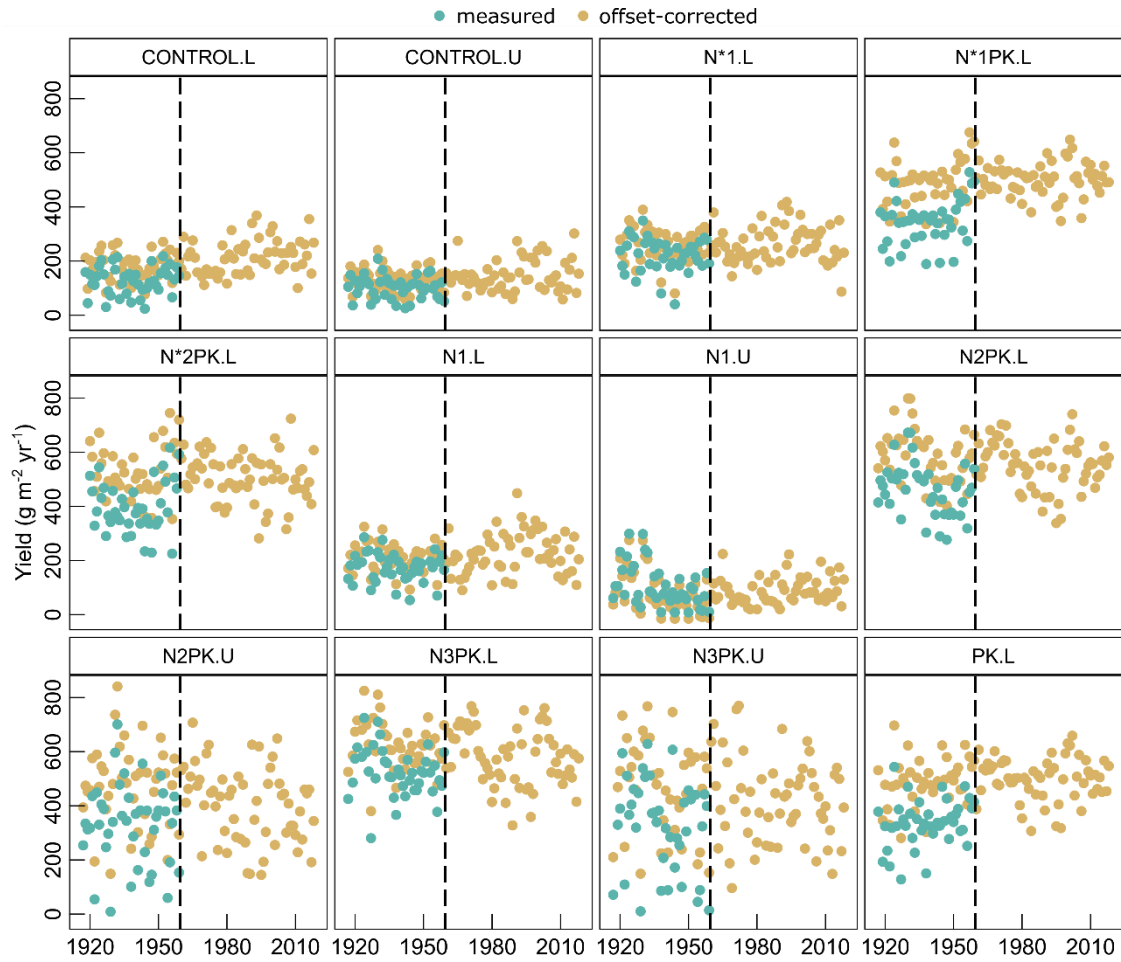

**Figure S3. Yields at Park Grass 1917-2018.** Total herbage yields ( $\text{g dry matter m}^{-2} \text{ yr}^{-1}$ ) before (1917-1959) and after (1960-2018). The vertical dashed line indicates the year (1960) when the methodology for yield estimation changed for each individual treatment. Data points before 1960 represent the yields measured with the pre-1960 methodology and the offset-corrected yields.

**Table S1. Sample size for all treatments.** Number of available yearly samples ( $n$ ) used for the determination of long-term changes in intrinsic water-use efficiency ( $W_i$ ), yield,  $\delta^{18}\text{O}_{\text{cellulose}}$  and N acquisition.  $n$  is presented for each treatment, for the ensemble of dicot-rich or grass-rich treatments, and for all treatments, separately for the two analysis periods.

| Treatment      | Period 1 (1917-1931) |       |                                          |               | Period 2 (2004-2018) |       |                                          |               |
|----------------|----------------------|-------|------------------------------------------|---------------|----------------------|-------|------------------------------------------|---------------|
|                | $W_i$                | Yield | $\delta^{18}\text{O}_{\text{cellulose}}$ | N acquisition | $W_i$                | Yield | $\delta^{18}\text{O}_{\text{cellulose}}$ | N acquisition |
| CONTROL.L      | 14                   | 14    | 14                                       | 14            | 15                   | 15    | 15                                       | 15            |
| CONTROL.U      | 15                   | 15    | 15                                       | 15            | 12                   | 15    | 12                                       | 13            |
| PK.L           | 14                   | 14    | 14                                       | 14            | 13                   | 15    | 15                                       | 15            |
| N*1.L          | 12                   | 12    | 11                                       | 12            | 15                   | 15    | 15                                       | 15            |
| N*1PK.L        | 14                   | 14    | 13                                       | 14            | 14                   | 15    | 15                                       | 15            |
| N*2.PK.L       | 12                   | 12    | 12                                       | 12            | 14                   | 15    | 14                                       | 15            |
| N1.L           | 12                   | 14    | 11                                       | 13            | 14                   | 15    | 15                                       | 15            |
| N1.U           | 15                   | 15    | 13                                       | 15            | 14                   | 15    | 15                                       | 15            |
| N2PK.L         | 15                   | 15    | 13                                       | 15            | 15                   | 15    | 15                                       | 15            |
| N2PK.U         | 15                   | 15    | 13                                       | 15            | 15                   | 15    | 15                                       | 15            |
| N3PK.L         | 13                   | 13    | 11                                       | 13            | 14                   | 15    | 15                                       | 15            |
| N3PK.U         | 14                   | 14    | 12                                       | 14            | 15                   | 15    | 15                                       | 15            |
| Dicot-rich     | 81                   | 83    | 78                                       | 82            | 83                   | 90    | 87                                       | 88            |
| Grass-rich     | 84                   | 84    | 74                                       | 84            | 87                   | 90    | 89                                       | 90            |
| All treatments | 165                  | 167   | 152                                      | 166           | 170                  | 180   | 176                                      | 178           |

**Table S2. List of publications used for estimation of the average sensitivity of stomatal conductance ( $g_s$ ) to  $\delta^{18}\text{O}_{\text{cellulose}}$**

| Reference                                                                   | Plant material                                                         | Experiment type         | $g_s$ sensitivity to $\delta^{18}\text{O}_{\text{cellulose}}$ or $\Delta^{18}\text{O}_{\text{cellulose}}$ (mol m <sup>-2</sup> s <sup>-1</sup> ‰ <sup>-1</sup> ) | $g_s$ range (mol m <sup>-2</sup> s <sup>-1</sup> ) | Factors for $g_s$ variation                                |
|-----------------------------------------------------------------------------|------------------------------------------------------------------------|-------------------------|------------------------------------------------------------------------------------------------------------------------------------------------------------------|----------------------------------------------------|------------------------------------------------------------|
| Barbour <i>et al.</i> , 2000, <i>Australian Journal of Plant Physiology</i> | 8 cultivars of bread wheat<br><i>Triticum aestivum</i> L.              | field                   | -0.18*                                                                                                                                                           | 0.47 - 0.63                                        | genetic diversity (cultivars)                              |
| Grams <i>et al.</i> , 2007, <i>Plant Cell &amp; Environment</i>             | <i>Fagus sylvatica</i> L. seedlings<br><i>Picea abies</i> L. seedlings | controlled (phytotrons) | -0.05*<br>-0.04*                                                                                                                                                 | 0.04 – 0.12<br>0.09 – 0.13                         | CO <sub>2</sub> , O <sub>3</sub> , plant-plant competition |
| Sullivan and Welker 2007, <i>Oecologia</i>                                  | <i>Salix arctica</i>                                                   | field                   | -0.09 <sup>†</sup>                                                                                                                                               | 0.24 – 0.42                                        | Soil temperature<br>Soil water content                     |
| Moreno-Gutiérrez <i>et al.</i> , 2007, <i>New Phytologist</i>               | 10 coexisting species                                                  | field                   | -0.01 <sup>†</sup>                                                                                                                                               | 0.07 – 0.18                                        | species                                                    |
| Hirl <i>et al.</i> , 2021, <i>New Phytologist</i>                           | Temperate grassland ecosystem                                          | field                   | -0.07 <sup>†</sup>                                                                                                                                               | 0.18 – 0.43                                        | seasonal and interannual variation of site conditions      |
| Baca Cabrera <i>et al.</i> , unpublished,                                   | <i>Lolium perenne</i> L.                                               | controlled (phytotrons) | -0.06*                                                                                                                                                           | 0.06 - 0.18                                        | CO <sub>2</sub>                                            |

\* $g_s$  sensitivity based on  $\delta^{18}\text{O}_{\text{cellulose}}$  measurements

<sup>†</sup> $g_s$  sensitivity based on  $\Delta^{18}\text{O}_{\text{cellulose}}$  measurements

**Table S3. Pre-1960 yield offset-correction.** Yield offset-corrections due to a change of yield determination methodology after 1959 were made for all yield estimates pre-1960 for each individual treatment. The offset-correction was calculated based on the linear regression between  $c_a$  and yield in periods pre and post 1960.

| Treatment | Average measured yield<br>1917-1959 (g m <sup>-2</sup> yr <sup>-1</sup> ) | Offset-correction<br>(g m <sup>-2</sup> yr <sup>-1</sup> ) |
|-----------|---------------------------------------------------------------------------|------------------------------------------------------------|
| CONTROL.L | 128                                                                       | +53                                                        |
| CONTROL.U | 102                                                                       | +32                                                        |
| N*1.L     | 222                                                                       | +40                                                        |
| N*1PK.L   | 344                                                                       | +147                                                       |
| N*2PK.L   | 399                                                                       | +128                                                       |
| N1.L      | 173                                                                       | +39                                                        |
| N1.U      | 104                                                                       | -23                                                        |
| N2PK.L    | 461                                                                       | +126                                                       |
| N2PK.U    | 332                                                                       | +140                                                       |
| N3PK.L    | 524                                                                       | +100                                                       |
| N3PK.U    | 327                                                                       | +139                                                       |
| PK.L      | 336                                                                       | +153                                                       |
